# Supplementary material for: KITLG Promotes Glomerular Endothelial Cell Injury in Diabetic Nephropathy by an Autocrine Effect
Source: MDPI journal article supplement (doi:10.3390/ijms231911723), 2022-10-03
Supplement: s1 [file s1]

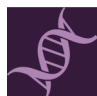

**Table S1.** The primers of KITLG, protocadherin 7 (PCDH7), protocadherin 17 (PCDH17) and GAPDH.

|          |         |                        |
|----------|---------|------------------------|
| KITLG_H  | Forward | tggatgaccttgtggagtgc   |
|          | Reverse | TCAGATGCCACTACAAAGTCCT |
| PCDH7_H  | Forward | GACTTCGAGGTGTCGGTGAT   |
|          | Reverse | GTGGGCAGCAGGTAAAGTGT   |
| PCDH17_H | Forward | GGCTGACAGTGACCAAGACA   |
|          | Reverse | TCAGAATGACCAAGCACTCG   |
| GAPDH_H  | Forward | GAGTCAACGGATTTGGTCGT   |
|          | Reverse | TTGATTTTGGAGGGATCTCG   |
